# Supplementary material
Source: publisher site journal article supplement (http://www.kjim.org/upload/media/kjim-2021-214-suppl7.pdf)
Supplement: Supplementary file 1 [file kjim-2021-214-suppl7.pdf]

**Supplementary Table 5. Multivariable Cox-hazard regression analyses for the effects of frequency and duration of SHS exposure at follow-up on new-onset hypertension in the individuals with new and sustained SHS exposure**

|                                           | Person-year | No. of events | Incidence rate,<br>10,000 person-year | Hazard ratio<br>(95% confidence interval) |
|-------------------------------------------|-------------|---------------|---------------------------------------|-------------------------------------------|
| No SHS exposure at baseline and follow-up | 189,752     | 1,608         | 84.7                                  | 1                                         |
| <b>New SHS exposure</b>                   |             |               |                                       |                                           |
| Daily time of SHS exposure at follow-up   |             |               |                                       |                                           |
| < 1 hour <sup>a</sup>                     | 5,820       | 60            | 103.1                                 | 1.30 (0.98–1.73)                          |
| ≥ 1 hour <sup>a</sup>                     | 2,625       | 34            | 129.5                                 | 1.87 (1.30–2.69) <sup>c</sup>             |
| <i>p</i> for trend                        |             |               |                                       | < 0.001                                   |
| Frequency of SHS exposure at follow-up    |             |               |                                       |                                           |
| < 3 times/week <sup>a</sup>               | 8,232       | 89            | 108.1                                 | 1.18 (0.93–1.49)                          |
| ≥ 3 times/week <sup>a</sup>               | 3,053       | 40            | 131.0                                 | 1.69 (1.19–2.38) <sup>c</sup>             |
| <i>p</i> for trend                        |             |               |                                       | 0.002                                     |
| <b>Sustained SHS exposure</b>             |             |               |                                       |                                           |
| Daily time of SHS exposure                |             |               |                                       |                                           |
| < 1 hour <sup>a</sup>                     | 4,113       | 54            | 131.3                                 | 1.87 (1.39–2.50) <sup>c</sup>             |
| ≥ 1 hour <sup>a</sup>                     | 2,850       | 32            | 112.3                                 | 1.51 (1.04–2.21) <sup>b</sup>             |
| <i>p</i> for trend                        |             |               |                                       | < 0.001                                   |
| Frequency of SHS exposure                 |             |               |                                       |                                           |
| < 3 times/week <sup>a</sup>               | 4,954       | 62            | 125.2                                 | 1.65 (1.26–2.15) <sup>c</sup>             |
| ≥ 3 times/week <sup>a</sup>               | 3,787       | 50            | 132.0                                 | 1.72 (1.24–2.38) <sup>c</sup>             |
| <i>p</i> for trend                        |             |               |                                       | < 0.001                                   |
| Duration of SHS exposure                  |             |               |                                       |                                           |
| < 10 years <sup>a</sup>                   | 2,181       | 23            | 105.6                                 | 1.80 (1.19–2.73) <sup>c</sup>             |
| ≥ 10 years <sup>a</sup>                   | 5,391       | 81            | 150.3                                 | 1.74 (1.36–2.23) <sup>c</sup>             |
| <i>p</i> for trend                        |             |               |                                       | < 0.001                                   |

Frequency of SHS exposure is the ordinal variable according to 3-1 questionnaire in Fig. 1. Multivariable model was adjusted for age, sex, body mass index, waist circumference, vigorous exercise (≥ 5 times/week), alcohol consumption, presence of diabetes, creatinine, uric acid, total cholesterol, high density lipoprotein cholesterol, low density lipoprotein cholesterol, triglycerides, and high-sensitivity C-reactive protein.

SHS, secondhand smoke

<sup>a</sup>Reference group is group without SHS exposure.

<sup>b</sup>*p* < 0.05.

<sup>c</sup>*p* < 0.01.
